# Supplementary material
Source: publisher site journal article supplement (https://www.dovepress.com/article/368476)
Supplement: Supplementary file 1 [file get_supplementary_file.php]

Supplementary Material

# Supplementary Data

**Romanian version of the Social Media Addiction Scale - Student Form (SMAS-SF)**

| In the questions below you will find different levels of use of social networks. Please read each statement carefully and choose the answer that best suits you. Do not omit any questions and mark the answer for each statement  1- Strongly disagree 2- Disagree 3- Neither agree nor disagree 4- Agree 5- Strongly agree | | În întrebările de mai jos veți regăsi diferite niveluri de utilizare a rețelelor de socializare. Vă rugăm să citiți cu atenție fiecare afirmație și să alegeți răspunsul care se potrivește cel mai bine. Nu omiteți nici o întrebare și marcați răspunsul aferent fiecărei afirmații  1-Dezacord total 2- Dezacord 3- Nici de acord, nici în dezacord 4- De acord 5- Complet de acord | Options / opțiuni | | | | |
| --- | --- | --- | --- | --- | --- | --- | --- |
| 1. | I am eager to go on social media. | Sunt nerăbdător să intru pe rețelele de socializare. | 1 | 2 | 3 | 4 | 5 |
| 2. | I look for internet connectivity everywhere so as to go on social media. | Oriunde mă aflu, caut conectivitate la internet, pentru a putea utiliza rețelele de socializare. | 1 | 2 | 3 | 4 | 5 |
| 3. | Going on social media is the first thing I do when I wake up in the morning. | Primul lucru pe care îl fac dimineața când mă trezesc, este să accesez rețelele de socializare. | 1 | 2 | 3 | 4 | 5 |
| 4. | I see social media networks as an escape from the real world. | Percep rețelele de socializare ca pe o evadare de la viața reală. | 1 | 2 | 3 | 4 | 5 |
| 5. | A life without social media becomes meaningless for me. | O viață fără rețelele de socializare devine fără sens pentru mine. | 1 | 2 | 3 | 4 | 5 |
| 6. | I prefer to use social media even there are somebody around me. | Prefer să utilizez rețelele de socializare, chiar și când este cineva cu mine. | 1 | 2 | 3 | 4 | 5 |
| 7. | I prefer the friendships on social media to the friendships in the real life. | Prefer prieteniile din rețelele de socializare în fața celor din viața reală. | 1 | 2 | 3 | 4 | 5 |
| 8. | I express myself better to the people with whom I get in contact on social media. | Mă exprim mai bine în fața persoanelor cu care iau legătura pe rețelele de socializare. | 1 | 2 | 3 | 4 | 5 |
| 9. | I am as I want to seem on social media. | Sunt ceea ce vreau să par pe rețelele de socializare. | 1 | 2 | 3 | 4 | 5 |
| 10. | I usually prefer to communicate with people via social media*.* | De obicei, prefer să comunic cu oamenii prin intermediul rețelelor de socializare. | 1 | 2 | 3 | 4 | 5 |
| 11. | Even my family frown upon, I cannot give up using social media. | Chiar dacă familia mea dezaprobă, nu pot renunța la utilizarea rețelelor de socializare. | 1 | 2 | 3 | 4 | 5 |
| 12. | I want to spend time on social media when I am alone. | Vreau să petrec timp pe rețelele de socializare când sunt singur/ă. | 1 | 2 | 3 | 4 | 5 |
| 13. | I prefer virtual communication on social media to going out. | Prefer comunicarea virtuală pe rețelele de socializare în loc să ies din casă. | 1 | 2 | 3 | 4 | 5 |
| 14. | Social media activities lay hold on my everyday life. | Activitățile pe care le desfășor pe rețelele de socializare, pun stăpânire pe viața mea zilnică. | 1 | 2 | 3 | 4 | 5 |
| 15. | I pass over my homework because I spend much time on social media. | Neglijez învățatul din cauză că petrec prea mult timp pe rețelele de socializare. | 1 | 2 | 3 | 4 | 5 |
| 16. | I feel bad if I am obliged to decrease the time I spend on social media. | Mă simt rău dacă sunt obligat/ă să reduc timpul petrecut pe rețelele de socializare. | 1 | 2 | 3 | 4 | 5 |
| 17. | I feel unhappy when I am not on social media. | Mă simt nefericit/ă când nu sunt pe rețelele de socializare. | 1 | 2 | 3 | 4 | 5 |
| 18. | Being on social media excites me. | Mă entuziasmează să fiu pe rețelele de socializare. | 1 | 2 | 3 | 4 | 5 |
| 19. | I use social media so frequently that I fall afoul of my family. | Utilizez atât de frecvent rețelele de socializare, încât intru în conflicte cu familia mea. | 1 | 2 | 3 | 4 | 5 |
| 20. | The mysterious world of social media networks always captivates me. | Lumea misterioasă a rețelelor de socializare mă captivează întotdeauna. | 1 | 2 | 3 | 4 | 5 |
| 21. | I do not even notice that I am hungry and thirsty when I am on social media. | Nici măcar nu observ că îmi este foame sau sete, când mă aflu pe rețelele de socializare. | 1 | 2 | 3 | 4 | 5 |
| 22. | I notice that my productivity has diminished due to social media. | Am observat că productivitatea mea s-a diminuat din cauza rețelelor de socializare. | 1 | 2 | 3 | 4 | 5 |
| 23. | I have physical problems because of social media use. | Am probleme fizice din cauza folosirii rețelelor de socializare. | 1 | 2 | 3 | 4 | 5 |
| 24. | I use social media even when walking on the road in order to be instantly informed about developments. | Utilizez rețelele de socializare, când merg pe drum ca să fiu informat(ă) instant cu privire la evenimente. | 1 | 2 | 3 | 4 | 5 |
| 25. | I like using social media to keep informed about what happens. | Îmi place să folosesc rețelele de socializare ca să rămân informat(ă) cu privire la ce se întâmplă. | 1 | 2 | 3 | 4 | 5 |
| 26. | I surf on social media to keep informed about what social media groups share. | Navighez pe rețelele de socializare ca să rămân informat(ă) cu privire la ce distribuie grupurile din rețelele de socializare. | 1 | 2 | 3 | 4 | 5 |
| 27. | I spend more time on social media to see some special announcements (e.g. birthdays). | Petrec mai mult timp pe rețelele de socializare ca să văd unele anunțuri speciale (de ex.: zile de naștere). | 1 | 2 | 3 | 4 | 5 |
| 28. | Keeping informed about the things related to my courses (e.g. homework, activities) makes me always stay on social media. | Dorința de a fi la curent cu lucrurile legate de cursurile mele (teme de casă, activități), mă face să stau întotdeauna pe rețelele de socializare. | 1 | 2 | 3 | 4 | 5 |
| 29. | I am always active on social media to be instantly informed about what my kith and kin share. | Sunt mereu activ pe rețelele de socializare, pentru a fi informat instant cu privire la ce distribuie cunoștințele și rudele mele. | 1 | 2 | 3 | 4 | 5 |

**Notes:** Adapted with permission from Sahin C. Social media addiction scale - student form: the Reliability and Validity Study. Turkish Online J Educ Technol. 2018;17(1):169–182. Copyright © The Turkish Online Journal of Educational Technology. 23
